# Supplementary material for: Collective behavior of passive and active circle swimming particle mixtures
Source: Royal Society of Chemistry journal article supplement (doi:10.1039/d2sm01066f), 2022-12-05
Supplement: d2sm01066f1.pdf [file d2sm01066f1.pdf]

# Supporting Information

## Collective behavior of passive and active circle swimming particle mixture

Bhadra Hrishikesh and Ethayaraja Mani\*

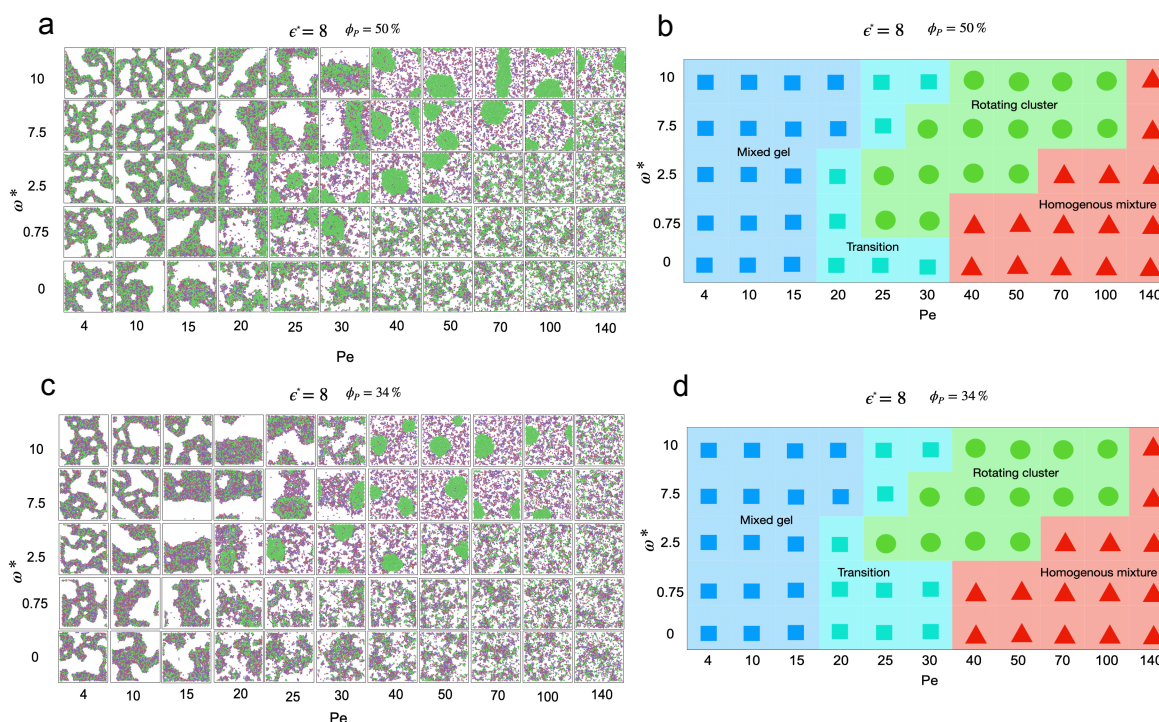

Figure S1. Comparison between two values of  $\phi_p = 50\%$  (a and b) and  $\phi_p = 34\%$  (c and d).
